# Supplementary material for: Prevalence of Anti–Adeno-Associated Virus Serotype 8 Neutralizing Antibodies and Arylsulfatase B Cross-Reactive Immunologic Material in Mucopolysaccharidosis VI Patient Candidates for a Gene Therapy Trial
Source: PubMed Central journal article supplement — Hum Gene Ther. 2015 Feb 4;26(3):145–52. doi: 10.1089/hum.2014.109 (PMC4367235; doi:10.1089/hum.2014.109), 2015-02-04
Supplement: Supp_Fig1.pdf [file Supp_Fig1.pdf]

## Supplementary Data

|                               |                        |
|-------------------------------|------------------------|
| <i>Homo sapiens</i>           | PRIE <b>L</b> HNIDPNF  |
| <i>Macaca fascicularis</i>    | PRMEL <b>L</b> HNIDPNF |
| <i>Macaca mulatta</i>         | PRVEL <b>L</b> HNIDPNF |
| <i>Canis lupus familiaris</i> | PRMEL <b>L</b> HNIDPNF |
| <i>Felis catus</i>            | PRKEL <b>L</b> HNIDPNF |
| <i>Bos taurus</i>             | PRMEL <b>L</b> HNIDPNF |
| <i>Rattus norvegicus</i>      | PRVEL <b>L</b> HNIDPDF |
| <i>Mus musculus</i>           | PRVEL <b>L</b> HNIDQDF |
| <i>Gallus gallus</i>          | PRVEL <b>L</b> HNIDPMF |
| <i>Salmo salar</i>            | PRLE <b>L</b> HNIDPLY  |
| <i>Aedes eegypti</i>          | PRRVV <b>L</b> NMIDEIY |

**SUPPLEMENTARY FIG. S1.** The histidine residue at position 393 of human arylsulfatase B (ARSB) is highly conserved. ARSB protein sequences from different species were aligned using BlastP. The histidine residue at position 393 of the ARSB protein from *Homo sapiens* and the corresponding residues from other species are indicated in bold and highlighted in green when conserved or in red when divergent. The following entries were used for the alignment: *Homo sapiens*, NP\_00037.2; *Macaca fascicularis*, XP\_005557290.1; *Macaca mulatta*, XP\_001108389.1; *Canis lupus familiaris*, NP\_001041598.1; *Felis catus*, NP\_001135731.1; *Bos taurus*, NP\_001094645.1; *Rattus norvegicus*, NP\_254278.1; *Mus musculus*, NP\_033842.3; *Gallus gallus*, XP\_003642960.1; *Salmo salar*, NP\_001167123.1; *Aedes aegypti*, XP\_001650409.1.
