# Supplementary material for: Prevalence of Anti–Adeno-Associated Virus Serotype 8 Neutralizing Antibodies and Arylsulfatase B Cross-Reactive Immunologic Material in Mucopolysaccharidosis VI Patient Candidates for a Gene Therapy Trial
Source: PubMed Central journal article supplement — Hum Gene Ther. 2015 Feb 4;26(3):145–52. doi: 10.1089/hum.2014.109 (PMC4367235; doi:10.1089/hum.2014.109), 2015-02-04
Supplement: Supp_Table1.pdf [file Supp_Table1.pdf]

SUPPLEMENTARY TABLE S1. PRIMERS AND PCR CONDITIONS FOR ARYLSULFATASE B EXONS AMPLIFICATION

|         | <i>Primer F</i>                                       | <i>Primer R</i>                                 | <i>Product size (bp)</i> | <i>Genomic coordinates</i> | <i>Annealing temperature (°C)</i> | <i>PCR cycles</i> |
|---------|-------------------------------------------------------|-------------------------------------------------|--------------------------|----------------------------|-----------------------------------|-------------------|
| Exon 1  | GTTTTCCCAGTCACGACGTTGTAgcccagttcctcattctatcagc        | CAGGAAACACAGCTATGACctcaaggcccggtaggag           | 465                      | chr5:78280681-78281145     | 58                                | 30                |
| Exon 2  | GTTTTCCCAGTCACGACGTTGTAgtttaaacatcccaagtc aacagatatga | CAGGAAACACAGCTATGACcgaatgattcactctgtgttcaaatatc | 417                      | chr5:78264711-78265127     | 60                                | 30                |
| Exon 3  | GTTTTCCCAGTCACGACGTTGTAtgctatttggatgcccctgctac        | CAGGAAACACAGCTATGACcaatggccttttccctacattgtc     | 390                      | chr5:78260159-78260548     |                                   |                   |
| Exon 4  | GTTTTCCCAGTCACGACGTTGTAtgcataaatcgaactgtcttattccttc   | CAGGAAACACAGCTATGACcgetccaatttgtcttctcattcc     | 373                      | chr5:78251035-78251407     |                                   |                   |
| Exon 5  | GTTTTCCCAGTCACGACGTTgtatttaagagtttaacateatctcatgc     | CAGGAAACACAGCTATGACCagtcagagctgctcttggagtttc    | 352                      | chr5:78181350-78181701     |                                   |                   |
| Exon 6  | GTTTTCCCAGTCACGACGTTGTAttaaaataattcatgccatttagagag    | CAGGAAACACAGCTATGACCaaagagaagaactagctagagacacac | 225                      | chr5:78135087-78135311     |                                   |                   |
| Exon 7  | GTTTTCCCAGTCACGACGTTGTAttctgcaagggtataaaatgctg        | CAGGAAACACAGCTATGACCgagggcagatagactggagatac     | 296                      | chr5:78077584-78077879     |                                   |                   |
| Exon 7a | GTTTTCCCAGTCACGACGTTGTAtctctgatacaacctgacctgag        | CAGGAAACACAGCTATGACCaaccttgggtctgaaagtcatttct   | 161                      | chr5:78111844-78112004     |                                   |                   |
| Exon 8  | GTTTTCCCAGTCACGACGTTGTActcttccctgaaatttagaacctg       | CAGGAAACACAGCTATGACCaacccagggtgggataacaatg      | 428                      | chr5:78076127-78076554     |                                   |                   |

Capital letters indicate M13 adapters.
